# Supplementary material for: Renal denervation for atrial fibrillation: a comprehensive updated systematic review and meta-analysis
Source: PubMed Central journal article supplement (PMC9553644; doi:10.1038/s41371-022-00658-0), 2022-01-29
Supplement: 41371_2022_658_MOESM1_ESM.pdf [file 41371_2022_658_MOESM1_ESM.pdf]

**This supplementary file includes the risk of bias assessment for the included studies including the MINORS assessment for non-Randomized studies and the Cochrane Risk of Bias Tool for Randomized studies**

**Table S1: MINORS score assessment for Non-Randomized studies**

| <b>Study Author (Year)</b>                                   | <b>Kiuchi et al., (2017)[19]</b> |
|--------------------------------------------------------------|----------------------------------|
| <b>A stated aim of the study</b>                             | 2                                |
| <b>Inclusion of consecutive patients</b>                     | 2                                |
| <b>Prospective collection of data</b>                        | 2                                |
| <b>Endpoint appropriate to the study aim</b>                 | 2                                |
| <b>Unbiased evaluation of endpoints</b>                      | 1                                |
| <b>Follow-up period appropriate to the major endpoint</b>    | 2                                |
| <b>Loss to follow up not exceeding 5%</b>                    | 1                                |
| <b>A control group having the gold standard intervention</b> | 2                                |
| <b>Contemporary groups</b>                                   | 2                                |
| <b>Baseline equivalence of groups</b>                        | 2                                |
| <b>Prospective calculation of the sample size</b>            | 1                                |
| <b>Statistical analyses adapted to the study design</b>      | 2                                |
| <b>MINORS score</b>                                          | 21                               |

|                          | Random sequence generation (selection bias) | Allocation concealment (selection bias) | Blinding of participants and personnel (performance bias) | Blinding of outcome assessment (detection bias) | Incomplete outcome data (attrition bias) | Selective reporting (reporting bias) | Other bias |
|--------------------------|---------------------------------------------|-----------------------------------------|-----------------------------------------------------------|-------------------------------------------------|------------------------------------------|--------------------------------------|------------|
| <b>HFIB-1 (2021)</b>     | +                                           | +                                       |                                                           | +                                               | +                                        | +                                    | -          |
| <b>HFIB-2 (2021)</b>     | +                                           | +                                       |                                                           | +                                               | +                                        | +                                    | +          |
| <b>Kluchi (2016)</b>     | +                                           | +                                       |                                                           | +                                               | +                                        | +                                    | +          |
| <b>Kluchi (2018)</b>     | +                                           | +                                       |                                                           | +                                               | +                                        | +                                    | +          |
| <b>Pokushakov (2014)</b> | +                                           | +                                       |                                                           | +                                               | +                                        | +                                    | +          |
| <b>Steinberg (2020)</b>  | +                                           | +                                       |                                                           |                                                 | +                                        | +                                    | +          |

**Figure S1:** Cochrane Risk of Bias Tool for Randomized studies. Green/Positive indicates low risk of bias, Red/Negative indicates a high risk of bias and empty space indicates unclear risk of bias.
